# Supplementary material for: Assessment of Inter- and Intraspecific P Efficiency in Forage Legumes as Affected by Recycling Fertiliser
Source: MDPI journal article supplement (doi:10.3390/agronomy14050901), 2024-04-25
Supplement: s1 [file s1]

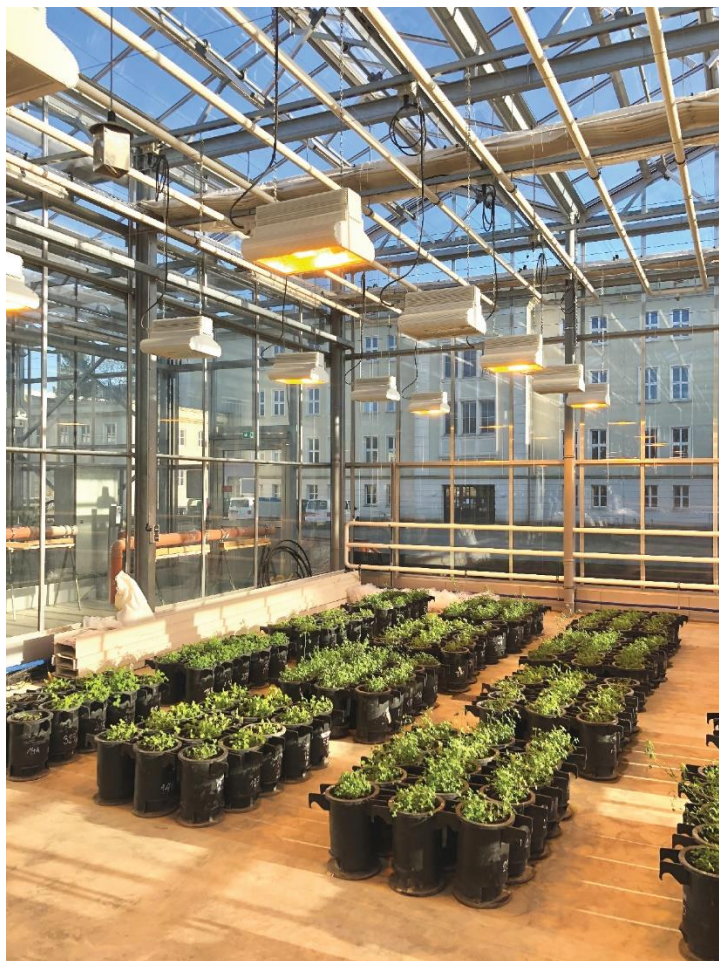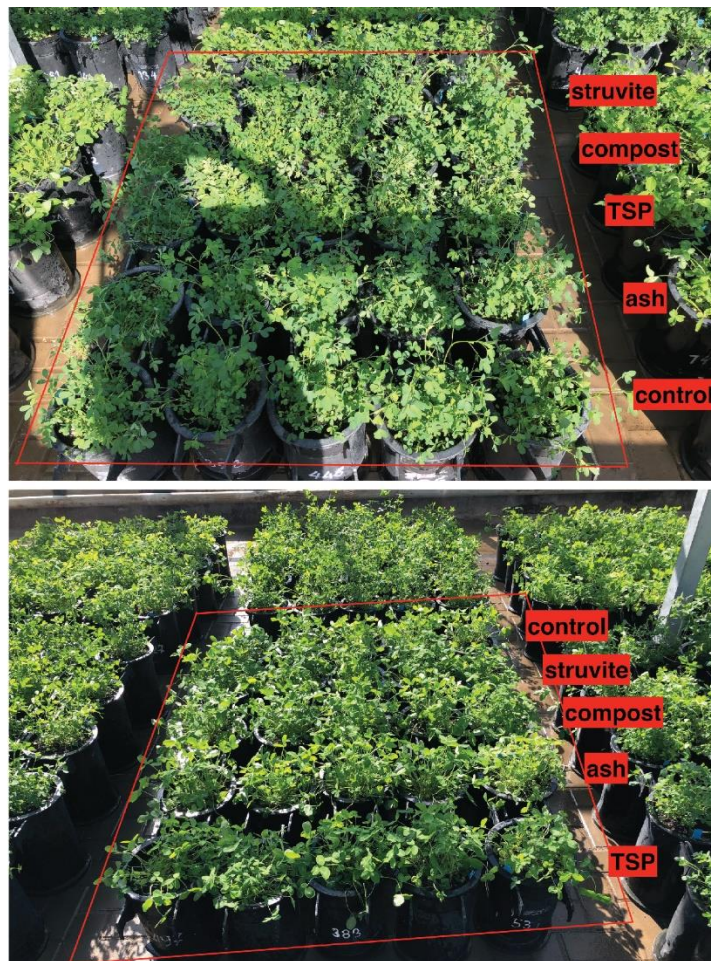

**Figure S1.** Alfalfa and red clover accessions in greenhouse. Left: view of greenhouse; top right: alfalfa accessions after 60 days of cultivation; bottom right: red clover accessions after 60 days of cultivation.

**Table S1.** Plant biomass of alfalfa and red clover accessions in the five studied treatments (no P, TSP, SSA, compost and struvite) in PE1.

| Biomass [p pot <sup>-1</sup> ] |           |          |      | Treatment |      |          |     |          |      |           |     |           |
|--------------------------------|-----------|----------|------|-----------|------|----------|-----|----------|------|-----------|-----|-----------|
| Species                        | Accession | No P*    |      | TSP       |      | SSA*     |     | Compost* |      | Struvite* |     | Average*  |
| Alfalfa                        | LE2812    | 10.9±1.7 | Cb   | 15.7±2.4  | Aab  | 12.9±1.9 | BCa | 14.6±1.7 | ABab | 15.3±0.4  | ABa | 13.9±2.4  |
|                                | LE2521    | 11.4±2.2 | Bb   | 13.4±2.8  | ABb  | 14.8±1.9 | Aa  | 15.3±1.8 | Aab  | 13.6±1.9  | ABa | 13.7±2.4  |
|                                | LE2511    | 12.3±2.6 | Bab  | 15.7±0.8  | Aab  | 15.6±1.3 | Aa  | 13.4±1.5 | ABb  | 14.2±2.5  | ABa | 14.2±2.1  |
|                                | LE2368    | 13.1±3.6 | Aab  | 16.8±1.7  | Aa   | 14.5±0.9 | Aa  | 15.5±5.9 | Aab  | 14.1±1.9  | Aa  | 14.8±3.2  |
|                                | LE2669    | 14.5±1.5 | ABa  | 14.2±1.8  | ABab | 13.7±4.0 | Ba  | 18.4±3.0 | Aa   | 16.5±1.5  | ABa | 15.5±2.9  |
|                                | Average   | 12.4±2.5 | B    | 15.2±2.2  | A    | 14.3±2.2 | A   | 15.4±3.3 | A    | 14.7±1.9  | A   | 14.4±2.7  |
| Red clover                     | LE1731    | 15.2±3.3 | BCc  | 12.6±2.0  | Ca   | 17.7±2.1 | ABa | 17.0±3.5 | ABa  | 20.0±1.2  | Aa  | 16.5±3.4  |
|                                | LE1423    | 20.4±3.2 | Aa   | 14.6±2.1  | Ba   | 16.2±3.3 | ABa | 18.0±3.2 | ABa  | 20.5±3.0  | Aa  | 18.1±3.6  |
|                                | LE1391    | 16.2±2.3 | Abc  | 14.0±2.0  | Aa   | 14.4±2.7 | Aa  | 17.6±3.5 | Aa   | 17.4±1.9  | Aa  | 15.9±2.7  |
|                                | LE1599    | 18.2±4.0 | Aab  | 14.3±1.3  | Aa   | 17.1±2.9 | Aa  | 19.0±4.0 | Aa   | 18.2±3.0  | Aa  | 17.4±3.3  |
|                                | LE1937    | 16.8±5.0 | ABbc | 15.8±1.6  | ABa  | 14.6±1.8 | Ba  | 16.8±0.8 | ABa  | 18.5±0.7  | Aa  | 16.4±2.2  |
|                                | Average   | 17.4±3.6 | B    | 14.1±1.9  | D    | 15.9±2.6 | C   | 17.7±2.9 | B    | 19.0±2.3  | A   | 16.8±3.1  |
| Average                        |           | 14.8±3.9 | B    | 14.7±2.1  | B    | 15.1±2.5 | B   | 16.5±3.3 | A    | 16.8±3.0  | A   | 5.66±0.18 |

No P = without P amendment, TSP = triple-super-phosphate, SSA = sewage sludge ash, compost = biowaste compost. Uppercase letters indicate a significant difference among treatments and lowercase letters indicate a significant difference among accessions within the same plant species (Duncan's new multiple range test with  $p < 0.05$ ). Asterisks indicate the significant different between plant species within same treatment. Mean ± standard deviation ( $n = 20$ ).

**Table S2.** Plant biomass of alfalfa and red clover accessions in the five studied treatments (no P, TSP, SSA, compost, and struvite) in PE2.

| Biomass [p pot <sup>-1</sup> ] |           |          |     | Treatment |     |          |     |          |     |           |     |          |
|--------------------------------|-----------|----------|-----|-----------|-----|----------|-----|----------|-----|-----------|-----|----------|
| Species                        | Accession | No P*    |     | TSP*      |     | SSA*     |     | Compost* |     | Struvite* |     | Average* |
| Alfalfa                        | LE713     | 17.3±2.3 | Aa  | 19.4±1.8  | Aab | 17.9±2.3 | Aa  | 17.8±1.2 | Aa  | 19.9±2.0  | Aa  | 18.5±2.0 |
|                                | LE2370    | 17.2±1.0 | Aa  | 18.8±1.4  | Ab  | 19.2±1.9 | Aa  | 18.9±0.8 | Aa  | 18.6±0.9  | Aa  | 18.5±1.3 |
|                                | LE2521    | 18.9±2.3 | Aa  | 19.4±0.2  | Aab | 18.3±1.0 | Aa  | 18.3±1.4 | Aa  | 20.0±1.2  | Aa  | 18.9±1.5 |
|                                | LE888     | 18.9±1.4 | ABa | 21.0±0.5  | Aa  | 18.2±2.5 | Ba  | 19.8±0.7 | ABa | 19.2±1.5  | ABa | 19.4±1.7 |
|                                | LE2669    | 18.7±2.0 | Aa  | 20.6±1.0  | Aab | 18.1±0.9 | Aa  | 19.6±2.4 | Aa  | 19.7±2.1  | Aa  | 19.3±1.8 |
|                                | Average   | 18.2±1.9 | C   | 19.9±1.4  | A   | 18.3±1.7 | C   | 18.9±1.5 | BC  | 19.5±1.5  | AB  | 18.9±1.7 |
| Red clover                     | LE1731    | 22.6±4.0 | Ab  | 23.3±3.7  | Aab | 23.8±1.3 | Aa  | 23.1±3.3 | Aab | 24.5±3.7  | Aab | 23.4±3.0 |
|                                | LE1391    | 25.8±2.0 | Aa  | 25.8±3.3  | Aa  | 23.4±1.7 | Aa  | 24.8±5.3 | Aa  | 27.3±4.1  | Aa  | 25.4±3.4 |
|                                | LE2750    | 23.2±2.9 | Aab | 20.4±2.5  | ABb | 20.9±3.4 | ABb | 19.6±4.2 | Bc  | 23.4±4.5  | Ab  | 21.6±3.5 |
|                                | LE1775    | 25.7±4.2 | Aa  | 25.4±4.8  | Aa  | 24.4±2.1 | Aa  | 25.2±4.1 | Aa  | 25.6±4.2  | Aab | 25.3±3.6 |
|                                | LE1804    | 21.8±3.2 | Ab  | 23.8±2.6  | Aab | 23.2±2.7 | Aab | 21.8±4.9 | Abc | 23.8±6.4  | Ab  | 22.9±3.9 |
|                                | Average   | 23.8±3.4 | AB  | 23.7±3.7  | AB  | 23.1±2.4 | B   | 23.1±4.4 | B   | 24.9±4.4  | A   | 23.7±3.7 |
| Average                        |           | 21.0±3.9 | BC  | 21.9±3.4  | AB  | 20.7±3.2 | C   | 20.9±3.8 | C   | 22.2±4.3  | A   | 21.3±3.8 |

No P = without P amendment, TSP = triple-super-phosphate, SSA = sewage sludge ash, compost = biowaste compost. Uppercase letters indicate a significant difference among treatments and lowercase letters indicate a significant difference among accessions within the same plant species (Duncan's new multiple range test with  $p < 0.05$ ). Asterisks indicate the significant different between plant species within same treatment. Mean ± standard deviation ( $n = 4$ ).

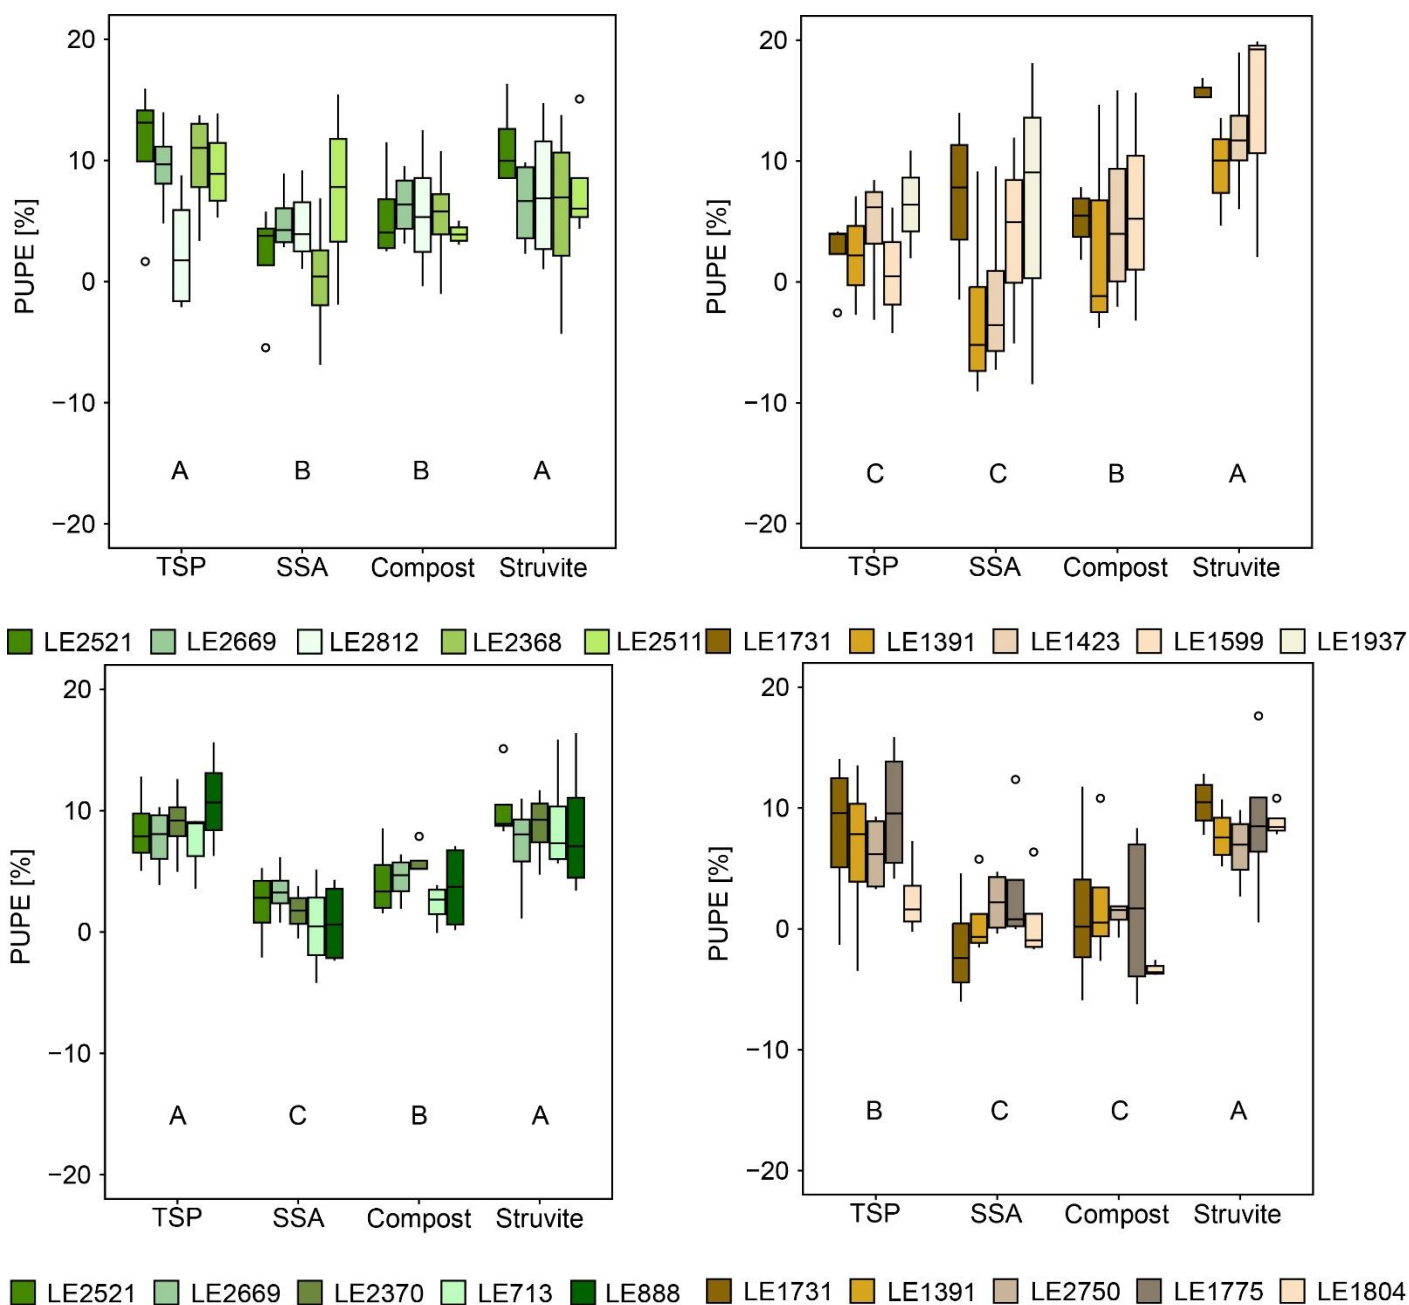

**Figure S2.** Phosphorus uptake efficiency (PUPE) of alfalfa and red clover accessions in the five studied treatments (TSP, SSA, compost and struvite) in PE1 (upper part) and PE2 (lower part). Different shades of green and brown colours are illustrated to differentiate alfalfa and red clover accessions, respectively. Letters indicate significant differences among treatments (on mean of accessions) within same plant species (Duncan's new multiple range test with  $p < 0.05$ ). Mean  $\pm$  standard deviation ( $n = 4$ )

**Table S3.** Phosphorus utilisation efficiency (PUTE) of alfalfa and red clover accessions in the five studied treatments (no P, TSP, SSA, compost, and struvite) in PE1.

| PUTE       |           | Treatment |     |        |      |         |     |          |     |          |     |          |
|------------|-----------|-----------|-----|--------|------|---------|-----|----------|-----|----------|-----|----------|
| Species    | Accession | No P*     |     | TSP*   |      | SSA     |     | Compost* |     | Struvite |     | Average* |
| Alfalfa    | LE2812    | 393±56    | Ab  | 334±38 | ABab | 358±62  | ABa | 377±17   | ABa | 323±53   | Bab | 357±50   |
|            | LE2521    | 408±37    | Ab  | 319±20 | Bab  | 415±23  | Aa  | 386±63   | Aa  | 311±34   | Bb  | 368±57   |
|            | LE2511    | 472±25    | Aa  | 360±51 | Ba   | 402±88  | ABa | 397±36   | ABa | 342±47   | Bab | 395±66   |
|            | LE2368    | 406±7     | Bb  | 325±28 | Dab  | 447±36  | Aa  | 360±23   | Ca  | 324±20   | Dab | 372±53   |
|            | LE2669    | 446±43    | Aab | 301±39 | Cb   | 426±59  | Aa  | 406±34   | ABa | 358±23   | BCa | 387±65   |
|            | Average   | 425±45    | A   | 328±38 | C    | 409±60  | A   | 385±38   | B   | 332±37   | C   | 376±59   |
| Red clover | LE1731    | 573±43    | Aa  | 414±94 | BCa  | 446±70  | Bb  | 461±27   | Ba  | 331±38   | Ca  | 445±96   |
|            | LE1423    | 500±66    | Aab | 341±22 | BCa  | 497±74  | Aab | 412±32   | Ba  | 310±24   | Ca  | 412±91   |
|            | LE1391    | 560±59    | Aa  | 400±8  | BCa  | 513±38  | Aa  | 425±39   | Ba  | 333±29   | Ca  | 453±95   |
|            | LE1599    | 539±40    | Aa  | 393±45 | Ba   | 439±45  | Bb  | 412±33   | Ba  | 312±43   | Ca  | 427±87   |
|            | LE1937    | 443±32    | Ab  | 329±42 | ABa  | 375±120 | ABc | 352±31   | ABb | 283±5    | Ba  | 352±78   |
|            | Average   | 532±62    | A   | 374±61 | D    | 455±85  | B   | 415±46   | C   | 316±32   | E   | 420±95   |
| Average    |           | 476±76    | A   | 348±54 | D    | 431±76  | B   | 399±44   | C   | 324±36   | E   | 396±81   |

No P = without P amendment, TSP = triple-super-phosphate, SSA = sewage sludge ash, compost = biowaste compost. Uppercase letters indicate a significant difference among treatments and lowercase letters indicate a significant difference among accessions within the same plant species (Duncan's new multiple range test with  $p < 0.05$ ). Asterisks indicate the significant different between plant species within same treatment. Mean  $\pm$  standard deviation ( $n = 4$ ).

**Table S4.** Phosphorus utilisation efficiency (PUTE) of alfalfa and red clover accessions in the five studied treatments (no P, TSP, SSA, compost, and struvite) in PE2.

| PUTE       |           | Treatment |    |        |     |        |     |          |     |          |    |         |
|------------|-----------|-----------|----|--------|-----|--------|-----|----------|-----|----------|----|---------|
| Species    | Accession | No P      |    | TSP    |     | SSA    |     | Compost* |     | Struvite |    | Average |
| Alfalfa    | LE713     | 491±43    | Aa | 370±11 | CDa | 466±43 | ABa | 424±31   | BCa | 357±30   | Da | 425±62  |
|            | LE2370    | 515±25    | Aa | 386±18 | CDa | 452±29 | Ba  | 410±14   | Ca  | 356±32   | Da | 424±61  |
|            | LE2521    | 474±45    | Aa | 367±24 | CDa | 441±20 | ABa | 399±23   | BCa | 349±15   | Da | 406±53  |
|            | LE888     | 499±56    | Aa | 350±37 | Ca  | 460±32 | ABa | 434±30   | Ba  | 363±22   | Ca | 421±67  |
|            | LE2669    | 467±12    | Aa | 363±29 | Ba  | 442±15 | Aa  | 414±15   | ABa | 373±63   | Ba | 412±50  |
|            | Average   | 489±39    | A  | 367±26 | D   | 452±28 | B   | 416±24   | C   | 360±33   | D  | 417±58  |
| Red clover | LE1731    | 458±31    | Aa | 376±40 | Ba  | 447±55 | Aa  | 453±45   | Aa  | 394±32   | Ba | 426±51  |
|            | LE1391    | 472±15    | Aa | 369±33 | Ba  | 459±48 | Aa  | 433±22   | Aa  | 360±24   | Ba | 419±55  |
|            | LE2750    | 493±23    | Aa | 393±30 | BCa | 430±8  | Aa  | 476±43   | Ba  | 358±36   | Ca | 428±58  |
|            | LE1775    | 477±37    | Aa | 383±11 | BCa | 444±43 | Aa  | 434±23   | ABa | 367±34   | Ca | 421±50  |
|            | LE1804    | 469±10    | Aa | 362±12 | Ba  | 434±11 | Aa  | 448±62   | Aa  | 372±22   | Ba | 417±52  |
|            | Average   | 474±25    | A  | 376±27 | C   | 443±36 | B   | 447±40   | B   | 370±30   | C  | 422±52  |
| Average    |           | 482±33    | A  | 372±27 | D   | 448±32 | B   | 431±36   | C   | 365±32   | D  | 420±55  |

No P = without P amendment, TSP = triple-super-phosphate, SSA = sewage sludge ash, compost = biowaste compost. Uppercase letters indicate a significant difference among treatments and lowercase letters indicate a significant difference among accessions within the same plant species (Duncan's new multiple range test with  $p < 0.05$ ). Asterisks indicate the significant different between plant species within same treatment. Mean  $\pm$  standard deviation ( $n = 4$ ).
